# Supplementary material for: A Phytochrome B-PIF4-MYC2/MYC4 module inhibits secondary cell wall thickening in response to shaded light
Source: PubMed Central journal article supplement — Plant Commun. 2022 Aug 4;3(6):100416. doi: 10.1016/j.xplc.2022.100416 (PMC9700123; doi:10.1016/j.xplc.2022.100416), 2022-08-04
Supplement: mmc1.pdf [file mmc1.pdf]

**Plant Communications, Volume 3**

**Supplemental information**

**A Phytochrome B-PIF4-MYC2/MYC4**

**module inhibits secondary cell wall**

**thickening in response to shaded light**

**Fang Luo, Qian Zhang, Hu Xin, Hongtao Liu, Hongquan Yang, Monika S. Doblin, Antony Bacic, and Laigeng Li**

## **Supplemental information**

A Phytochrome B-PIF4-MYC2/MYC4 Module Inhibits Secondary Cell Wall  
Thickening in Response to Shaded Light

Fang Luo, Qian Zhang, Hu Xin, Hongtao Liu, Hongquan Yang, Monika S Doblin,  
Antony Bacic and Laigeng Li

**Supplemental Figures 1~9;**

**Supplemental Table 2**

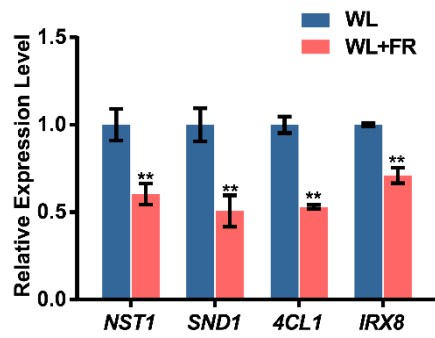

**Supplemental Figure 1. Expression of SCW-related genes under different light conditions.**

Expression of SCW regulatory (*NST1* & *SND1*) and biosynthesis-related (*4CL1* & *IRX8*) genes in stems of *Arabidopsis* grown under different light conditions. Three biological repeats were performed. Student's t test (\*\*P < 0.01) was used for statistical analysis, mean  $\pm$  SD.

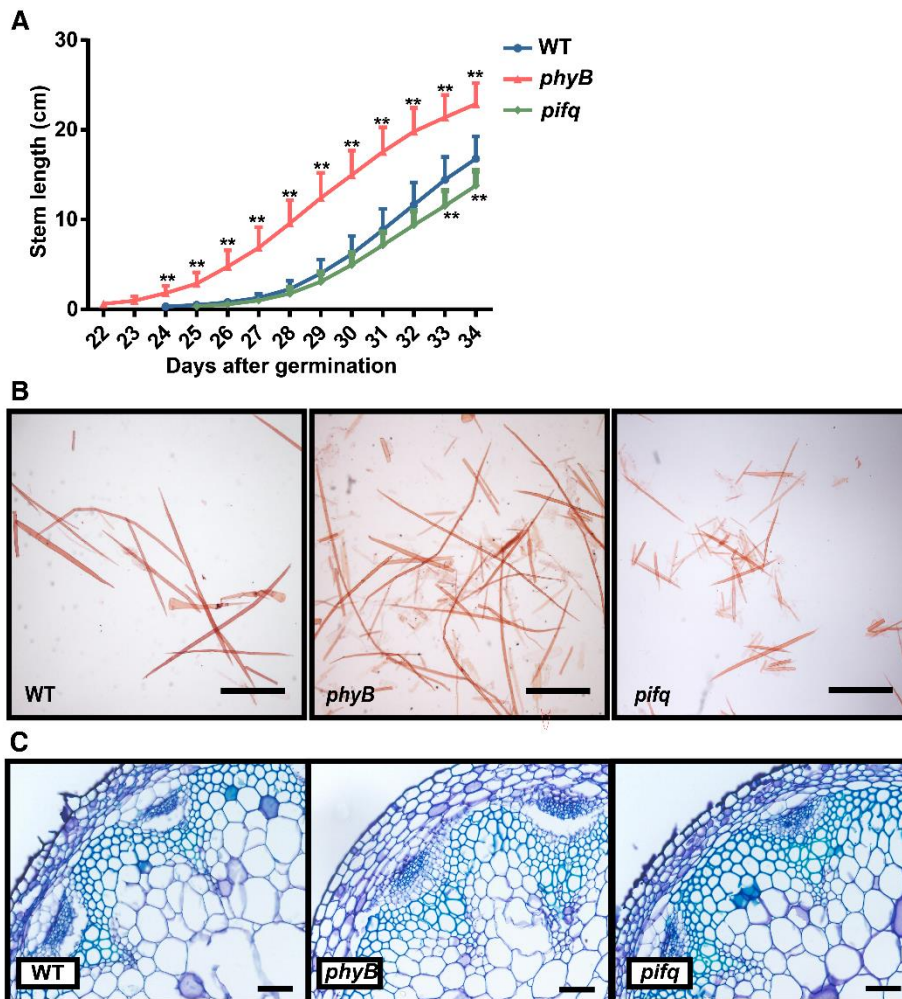

**Supplemental Figure 2. *PHYB* and *PIFs* affect inflorescence stem properties.**

(A) Length of inflorescence stems was recorded in WT, *phyB* and *pifq* plants grown in white light. Student's t test (\*\*P < 0.01) was used for statistical analyses, n = 15, mean ± SD.

(B) Disaggregated fiber cells of basal inflorescence stems stained with Safranin T. Scale bar = 0.5 mm.

(C) Light micrographs of stem cross-sections stained with Toluidine blue. Scale bar = 50 μm.

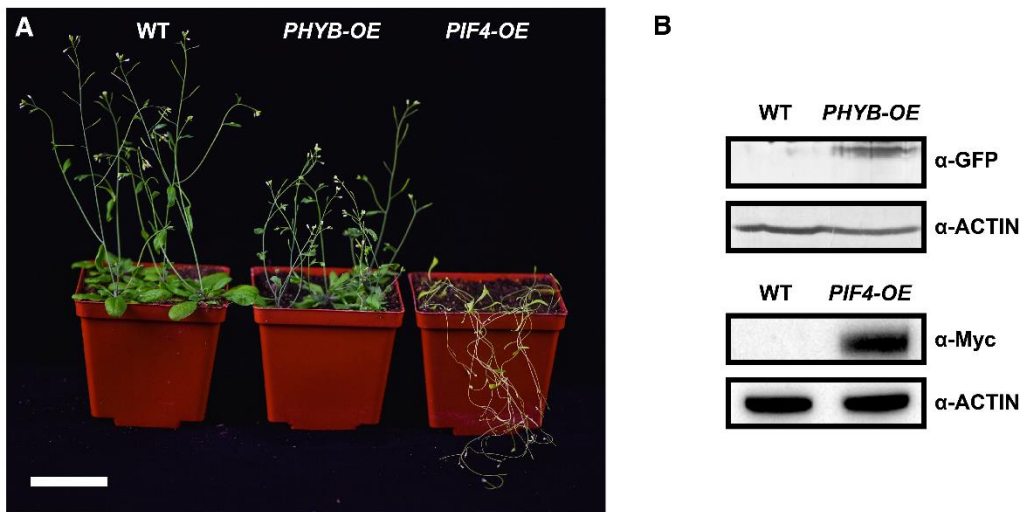

**Supplemental Figure 3. Phenotypes of *PHYB-OE* and *PIF4-OE* plants.**

**(A)** Inflorescence stem phenotypes of *PHYB-OE* and *PIF4-OE* plants relative to WT. Scale bar = 5 cm.

**(B)** Western blot detection of PHYB-YFP and PIF4-TAP proteins in the transgenic plants. ACTIN was used as an internal control.

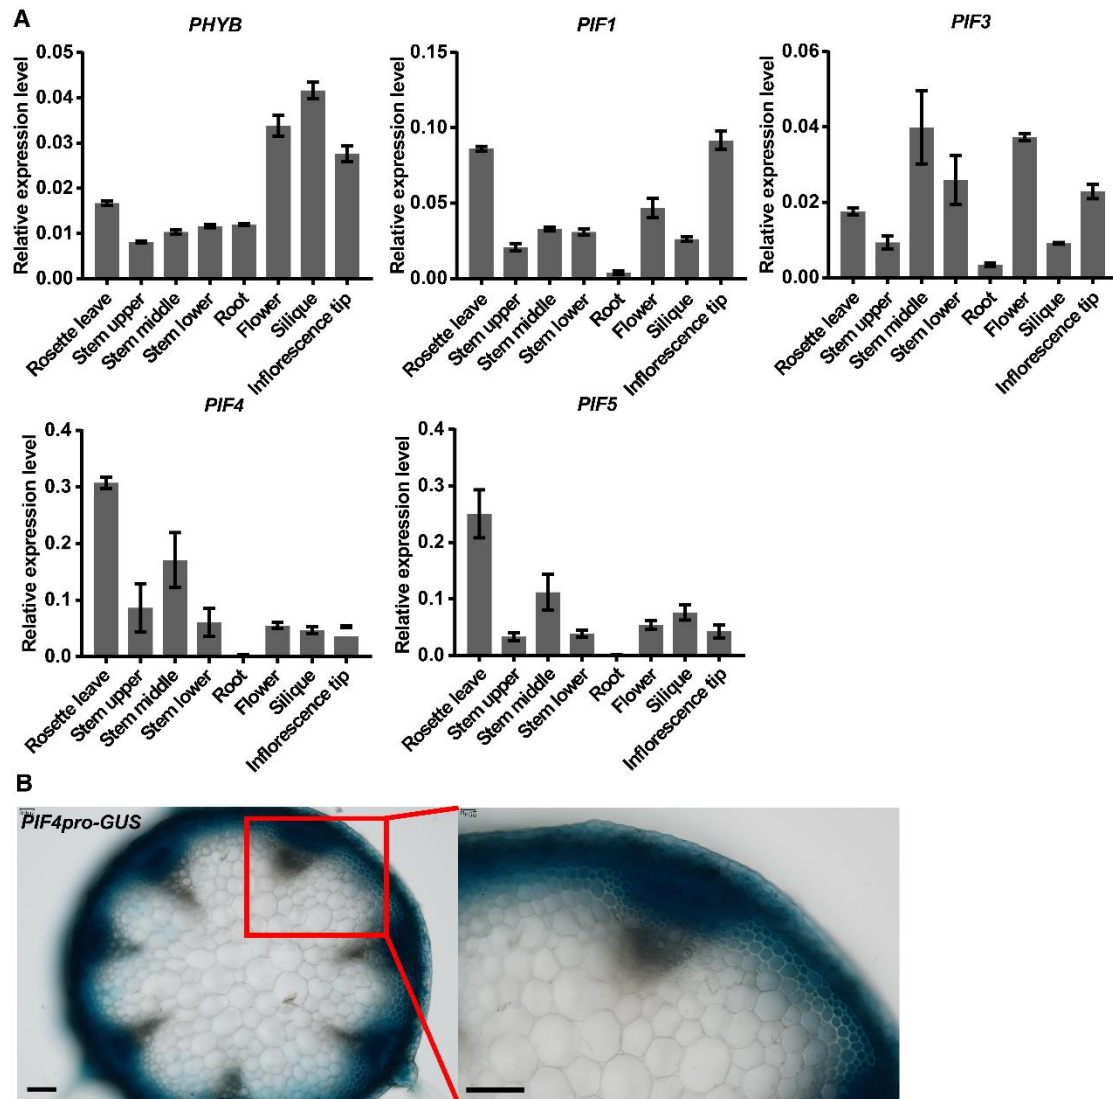

**Supplemental Figure 4. Expression pattern of *phyB* and *PIF* genes.**

(A) Expression of *PHYB*, *PIF1*, *PIF3*, *PIF4*, and *PIF5* in different tissues of 5-week old *Arabidopsis* plants. The y-axis range of *PIF4/PIF5* showing their expression level is one order of magnitude larger than that of *PIF1/PIF3*. Mean  $\pm$  SD.

(B) *PIF4* promoter activity in *Arabidopsis* inflorescence stems. GUS activity was stained in hand-cut cross-sections of inflorescence stem. Scale bars = 200  $\mu$ m.

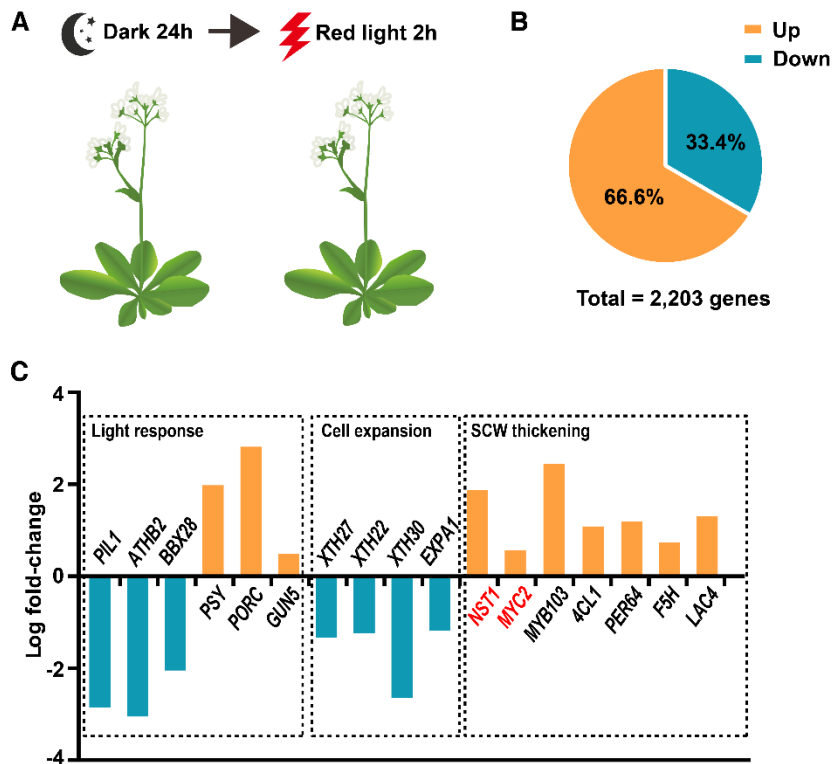

**Supplemental Figure 5. Transcriptional analysis of *Arabidopsis* inflorescence stem treated with red light.**

(A) Schematic showing sampling for RNA-sequencing. *Arabidopsis* plants at 5-weeks old were transferred to the dark for 24 h to shut-down expression of the light-induced genes. Plants were then treated with red light for 2 h and the inflorescence stem harvested to examine gene expression.

(B) Pie chart of up-regulated and down-regulated genes in response to red light.

(C) Log<sub>2</sub> value of differentially expressed light-response genes, cell expansion genes and SCW thickening-related genes.

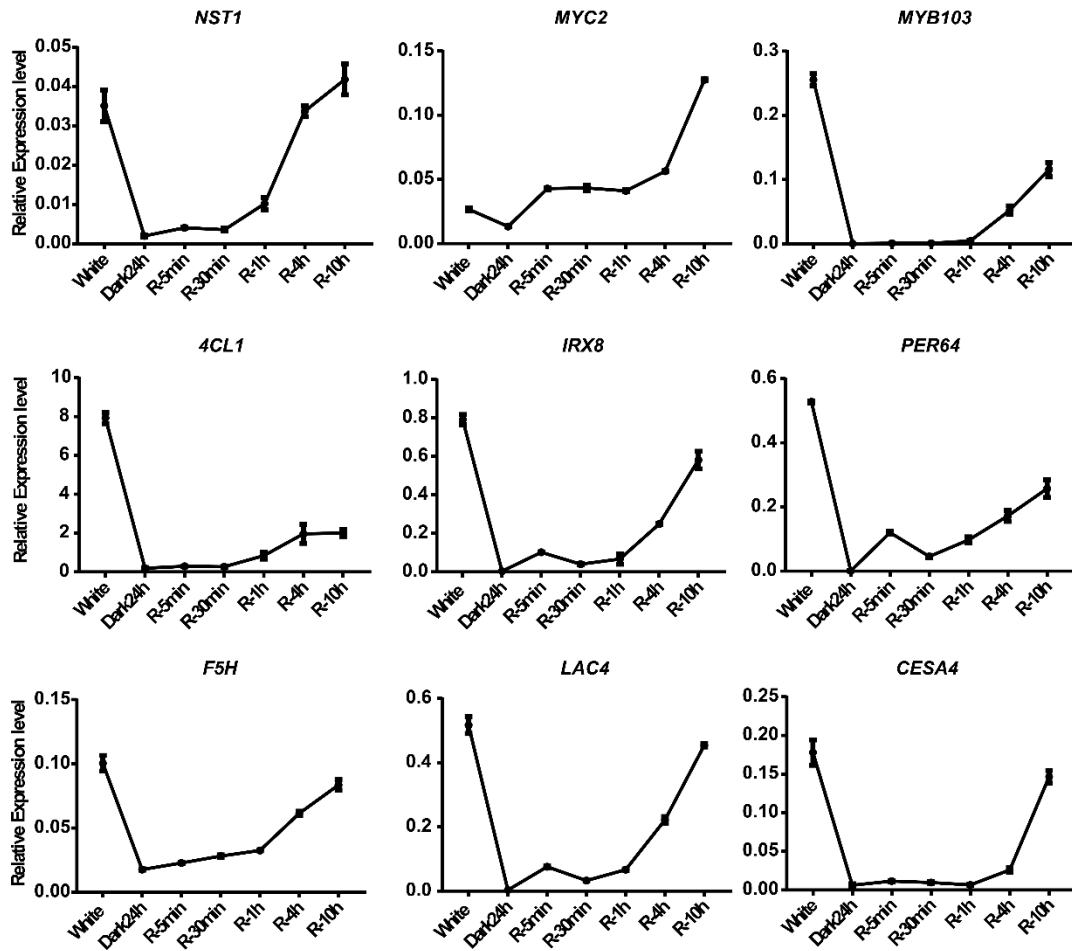

**Supplemental Figure 6. Expression of *MYC2* and SCW formation-related genes is induced by red light.**

*Arabidopsis* plants at 5-weeks old were transferred to the dark for 24 h to shut-down expression of light-induced genes. Plants were then treated with red light to examine the red-light induction of gene expression in inflorescence stem. R: red light. Three biological repeats were performed. Mean  $\pm$  SD.



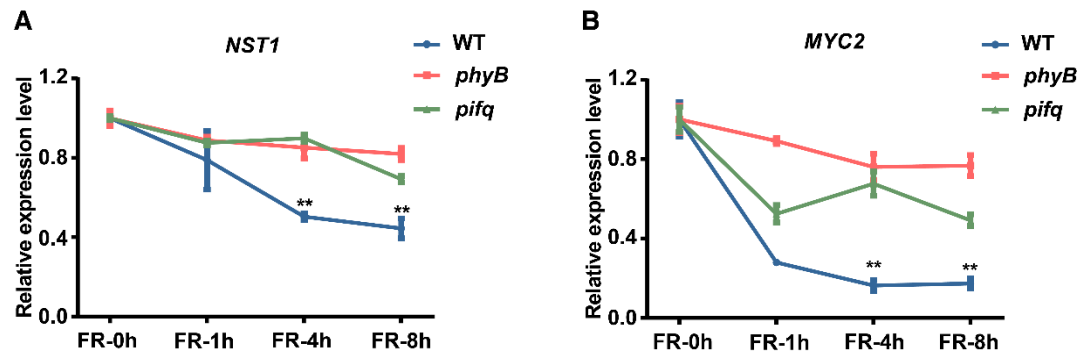

**Supplemental Figure 7. Inhibition of MYC2 expression in response to far-red light treatment is dependent upon PHYB and PIFs.**

Expression of *NST1* and *MYC2* in FR light. *Arabidopsis* inflorescence stem was treated with far-red light for 0, 1, 4 and 8 h to examine gene expression. Three biological replicates were performed. Student's t test (\*\*P < 0.01) was used for statistical analysis, mean  $\pm$  SD.

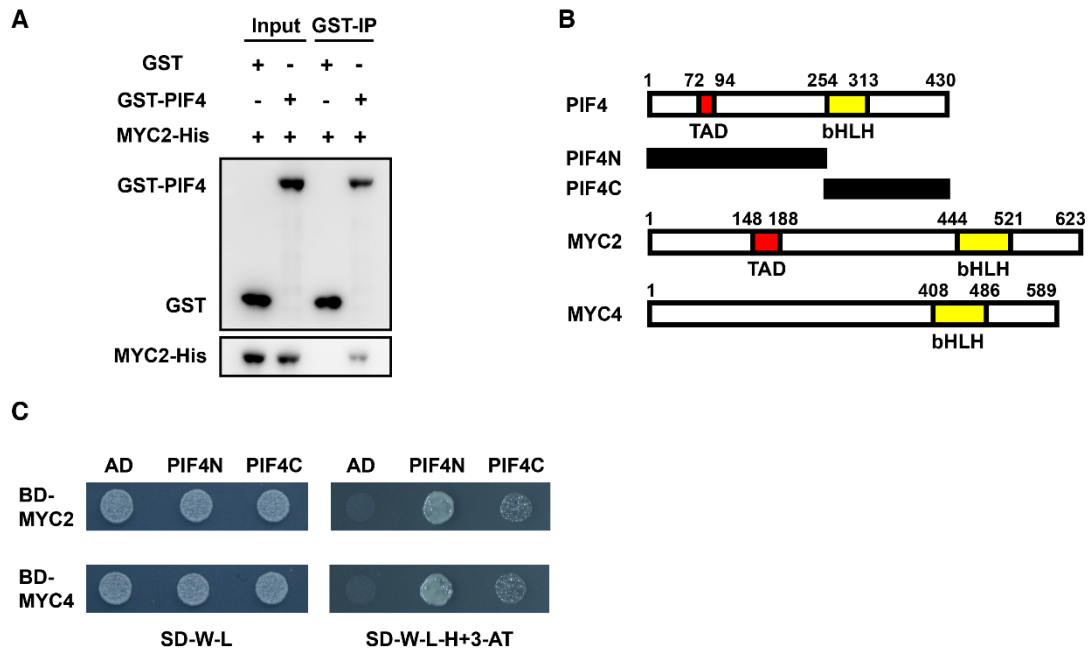

**Supplemental Figure 8. PIF4 physically interacts with MYC2.**

(A) Pull-down assay of PIF4 and MYC2. His-tagged MYC2 was incubated with purified GST-PIF4 or GST proteins and GST agarose. Bound proteins were detected by immunoblotting using anti-GST and anti-His.

(B) Schematic representation of the constructs of PIF4, MYC2 and MYC4 and truncated fragments of PIF4 in the yeast two-hybrid assay.

(C) Interaction of the PIF4 fragments with MYC2 and MYC4. AD: Gal4 activation domain. BD: Gal4 DNA binding domain.

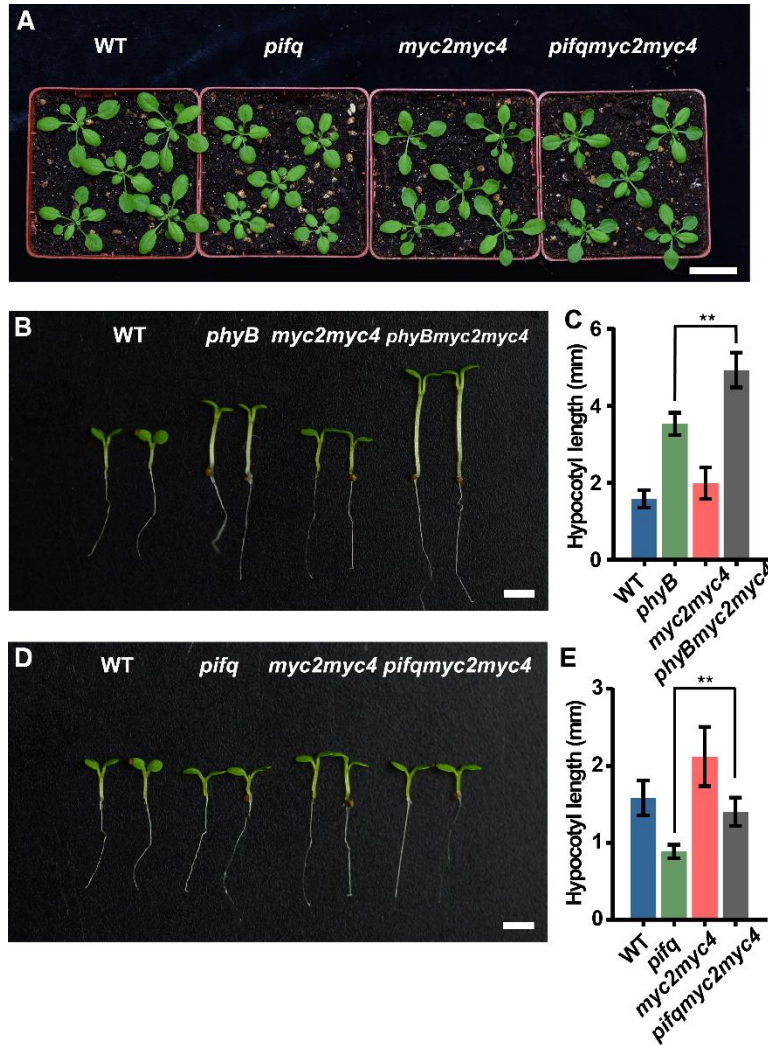

**Supplemental Figure 9. *myc2myc4* mutation rescued the phenotype of *pifq* mutant.**

(A) Mutation of *myc2myc4* in *pifq* partially restored its phenotype in rosette leaves. Scale bar = 3 cm.

(B) Mutation of *myc2myc4* in *phyB* enhanced its phenotype in hypocotyl elongation. Scale bar = 2 mm.

(C) Measurements of hypocotyl length in (B). Tukey HSD test (\*\*P < 0.01) was used for statistical analysis, n = 6, mean ± SD.

(D) Mutation of *myc2myc4* in *pifq* restored its hypocotyl elongation phenotype. Scale bar = 2 mm.

(E) Measurements of hypocotyl length in (D). Tukey HSD test (\*\*P < 0.01) was used for statistical analysis, n = 6, mean ± SD.

**Supplemental Table 2: Primer sequences used in this study**

|               |                                  |                                  |
|---------------|----------------------------------|----------------------------------|
| qRT-PCR       | <i>PHYB</i>                      | Forward:TTGGAGGCCACAGACTTGAACG   |
|               |                                  | Reverse:TCCCTCTTTAGCACAAATGAACCG |
|               | <i>PIF1</i>                      | Forward:CACGGATCCATATCAGCAGTTCC  |
|               |                                  | Reverse:TGGGTACGATGTTGCTTGATTCTG |
|               | <i>PIF3</i>                      | Forward:AACGGGTTTGGGTTCAAAGAGAAG |
|               |                                  | Reverse:TTGATCCTATCACGCCGTCTCC   |
|               | <i>PIF4</i>                      | Forward:CCGACCGGTTTGCTAGATACATCG |
|               |                                  | Reverse:ATCTCCATCGGCTGCATCTGAGTC |
|               | <i>PIF5</i>                      | Forward:ACTCATACCTCACTGCAGCAGAAC |
|               |                                  | Reverse:CACTCCCATCCACATCACTTGG   |
|               | <i>MYC2</i>                      | Forward:AAACCACGTCGAAGCAGAGAGAC  |
|               |                                  | Reverse:TTGGTACAACCGCTCGTAACGC   |
|               | <i>NST1</i>                      | Forward:TGGAAAGCAACTGGCCGCGA     |
|               |                                  | Reverse:GGGAAGCTCCTCCGACGGGA     |
|               | <i>SND1</i>                      | Forward:TGCATGCCCGAGAGCCAAACA    |
|               |                                  | Reverse:GCCAAGCTACGAGCCGGTCA     |
|               | <i>CESA4</i>                     | Forward:AGATGCGGAGTGGAAAGAACGTG  |
|               |                                  | Reverse:GGTTGTCTTGCTTCAGCATCTAGG |
|               | <i>4CL1</i>                      | Forward:AGGCTTTGCTCATCGGTCATCC   |
|               |                                  | Reverse:CCAGCTGCTTCTTCTTTCATTGCG |
|               | <i>IRX8</i>                      | Forward:CGACCTAGCGGCTTGGAGGA     |
|               |                                  | Reverse:GCGGCACTTTCAGCATCGGC     |
|               | <i>LAC4</i>                      | Forward:TGCATTGGTCATCCTTCCCAAAC  |
|               |                                  | Reverse:CCACCATTACCTAGAACGATGAC  |
|               | <i>F5H</i>                       | Forward:GGTCTCTTGTAACGTTGGTAAGCC |
|               |                                  | Reverse:GGTAAGTTATGTTGCGGGTCAGTG |
|               | <i>PER64</i>                     | Forward:TTCCACGACTGTTTCGTCAGAGG  |
|               |                                  | Reverse:GGAGGTCCATCTTCTCTGCTTTG  |
| <i>MYB103</i> | Forward:ATGGAGTTGTGGGAAACAGGTG   |                                  |
|               | Reverse:TGACGGTTGATGACGACTGTAATG |                                  |
| <i>ACTIN2</i> | Forward:AACCGGTATTGTGCTGGATTC    |                                  |
|               | Reverse:AGGTTTCCATCTCCTGCTCG     |                                  |
| Genotyping    | <i>PHYB</i>                      | Forward:GCAGAACCGTGTCCGAATGATAG  |
|               |                                  | Reverse:GATTCGCAAGCAACCACTCC     |
|               | <i>MYC2</i>                      | Forward:GACCCGATTGGAACACCTGGA    |
|               |                                  | Reverse:GCTCTGAGCTGTTCTTGCGTA    |
|               | <i>MYC4</i>                      | Forward:GACGAATGTTCAAGTAACCGA    |
|               |                                  | Reverse:CCATTCTCAATCCCATTCTTG    |
|               | <i>PIF1</i>                      | Forward:CTCTTTTGGATCTTCTGTTGGG   |
|               |                                  | Reverse:GACTTGCGCACGATAGCTAAC    |
|               | <i>PIF3</i>                      | Forward:CACATGTAGTATAACCATCTTG   |
|               |                                  | Reverse:GGCCAAGAAAACTTGCCAG      |

|  |             |                                           |
|--|-------------|-------------------------------------------|
|  | <i>PIF4</i> | Forward:ACCTCCTCAAGTCATGGTTAAGCCTAAGCC    |
|  |             | Middle:TCCAAACGAGAACCGTCGGT               |
|  |             | Reverse:TAGCATCTGAATTCATAACCAATCTCGATACAC |
|  | <i>PIF5</i> | Forward:TCCTTGTTTGTGGGTTTGGAC             |
|  |             | Reverse:TGAAAGAGAAGCATAAGAGGGG            |
